# Supplementary material
Source: Springer Nature journal article supplement (https://www.springermedizin.de/resource/supplementary/12982_2006_28_MOESM3_ESM.pdf/9604296)

**proportion of contacts**

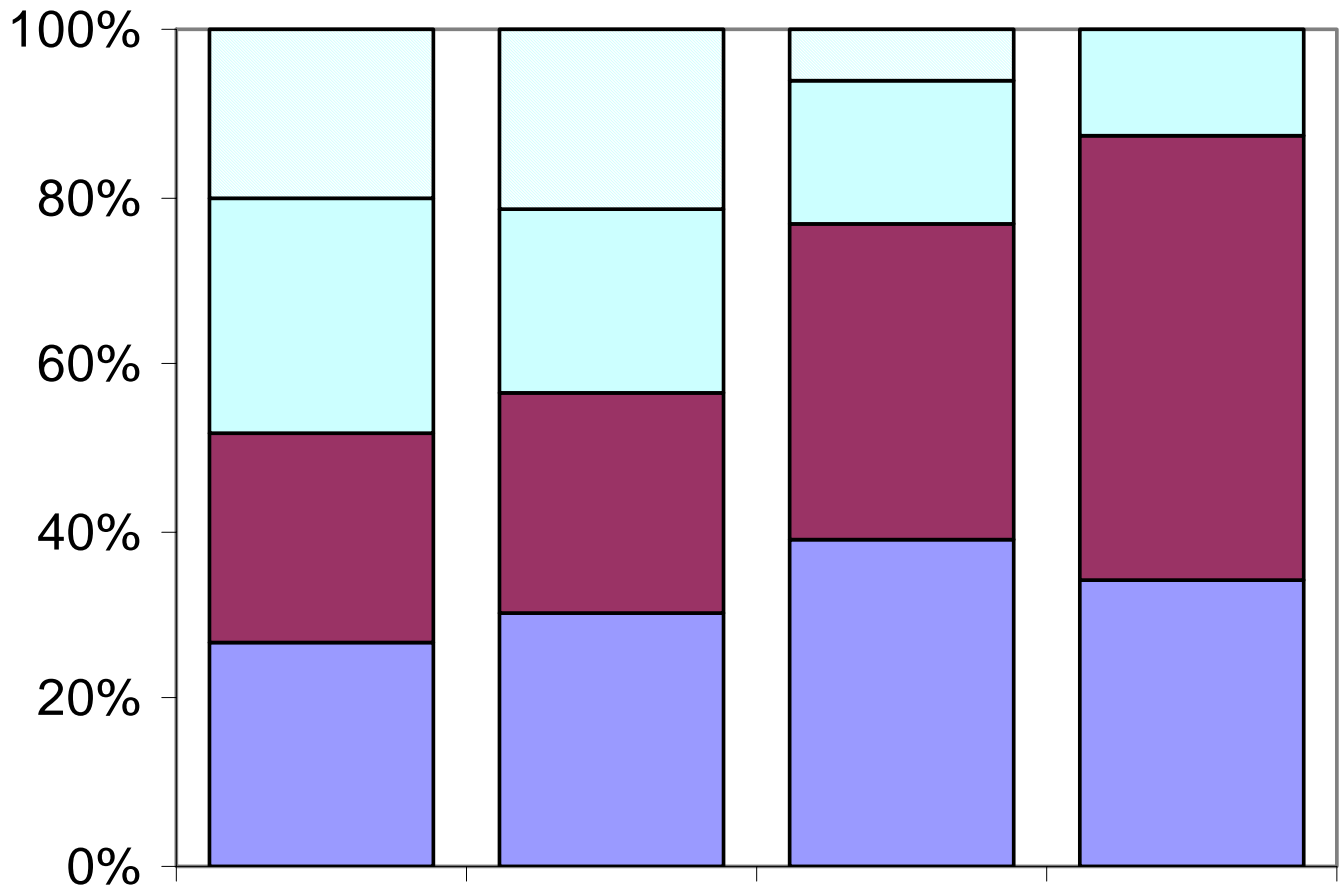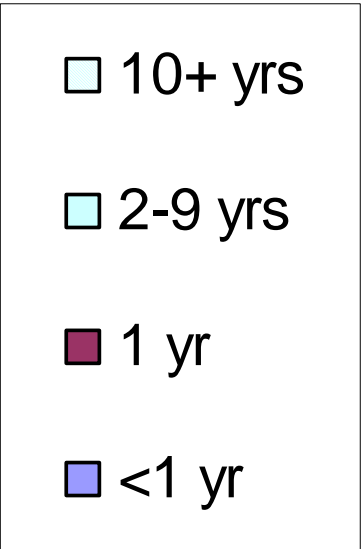

Level 1      Level 2      Level 3      Level 4

**contact level**

Supplement: MOESM3 [file 9604296]
